# Supplementary material for: Metabolic phenotypes and the gut microbiota in response to dietary resistant starch type 2 in normal-weight subjects: a randomized crossover trial
Source: PubMed Central journal article supplement (PMC6426958; doi:10.1038/s41598-018-38216-9), 2019-03-20
Supplement: 41598_2018_38216_MOESM1_ESM.pdf [file 41598_2018_38216_MOESM1_ESM.pdf]

**Metabolic phenotypes and the gut microbiota in response to dietary resistant starch  
type 2 in normal-weight subjects: a randomized crossover trial**

Lei Zhang<sup>1,2,†</sup>, Yang Ouyang<sup>3,4,†</sup>, Huating Li<sup>1,\*</sup>, Li Shen<sup>5</sup>, Yueqiong Ni<sup>6,7</sup>, Qichen Fang<sup>1</sup>,  
Guangyu Wu<sup>1,2</sup>, Lingling Qian<sup>1,2</sup>, Yunfeng Xiao<sup>8</sup>, Jing Zhang<sup>1,2</sup>, Peiyuan Yin<sup>3</sup>, Gianni  
Panagiotou<sup>6,7</sup>, Guowang Xu<sup>3,\*</sup>, Jianping Ye<sup>1,9</sup>, and Weiping Jia<sup>1,\*</sup>

**Supplementary Information**

**Table S1.** Nutrients intake at baseline and after 4-week CS or RS supplementation.

| Variable            | CS            |               | RS            |                  | <i>p</i> value |
|---------------------|---------------|---------------|---------------|------------------|----------------|
|                     | 0 week        | 4 weeks       | 0 week        | 4 weeks          |                |
| Total energy (kcal) | 1578.09±33.51 | 1560.02±32.39 | 1548.09±33.51 | 1536.51±33.88    | NS             |
| Protein (g)         | 63.36±2.08    | 64.43±2.08    | 65.46±2.08    | 64.35±1.94       | NS             |
| Fat (g)             | 41.14±1.53    | 42.21±1.31    | 43.11±1.51    | 42.68±0.92       | NS             |
| Cholesterol (mg)    | 354.29±22.50  | 348.86±24.53  | 358.39±23.50  | 339.81±13.36     | NS             |
| Fiber (g)           | 9.77±0.48     | 10.04±0.57    | 9.84±0.58     | 54.99±6.62***### | <0.001         |
| Carbohydrates (g)   | 223.29±5.78   | 223.59±5.27   | 223.34±6.08   | 221.52±5.21      | NS             |

Data are presented as mean ± SEM. Significance was determined by GEE model. *p* value was statistical significance between CS effect and RS effect;

\*\*\* *p* < 0.001, RS 0 week vs. RS 4 weeks, ### *p* < 0.001, RS 4 weeks vs. CS 4 weeks.

**Table S2.** Summary of serum metabolites of subjects before and after 4-week CS or RS supplementation.

| Variable              | CS              |                 | RS              |                 | <i>p</i> value |
|-----------------------|-----------------|-----------------|-----------------|-----------------|----------------|
|                       | 0 week          | 4 weeks         | 0 week          | 4 weeks         |                |
| Isobutyrate (nM)      | 0.45(0.42,0.59) | 0.46(0.31,0.55) | 0.63(0.43,0.88) | 0.45(0.38,0.56) | NS             |
| Valerate (nM)         | 0.46(0.40,0.54) | 0.43(0.35,0.48) | 0.48(0.43,0.63) | 0.43(0.38,0.47) | NS             |
| Isovalerate (nM)      | 0.44(0.37,0.71) | 0.41(0.32,0.44) | 0.56(0.4,0.68)  | 0.37(0.29,0.47) | NS             |
| Hexanoate (nM)        | 1.44(1.27,1.60) | 1.15(1.07,1.37) | 1.5(1.26,1.67)  | 1.35(1.21,1.50) | NS             |
| Carnitine C2:0        | 0.90(0.68,1.27) | 0.85(0.74,1.13) | 0.97(0.72,1.11) | 0.87(0.80,1.03) | NS             |
| Carnitine C3:0        | 1.01(0.88,1.18) | 1.07(0.82,1.21) | 0.95(0.82,1.18) | 0.92(0.77,1.09) | NS             |
| Carnitine C4:0        | 1.04(0.80,1.25) | 1.09(0.86,1.40) | 0.97(0.80,1.50) | 1.03(0.87,1.34) | NS             |
| Carnitine C5:0        | 0.98(0.81,1.40) | 1.08(0.81,1.31) | 1.07(0.81,1.26) | 1.11(0.84,1.24) | NS             |
| Carnitine C10:0       | 1.22(0.84,1.36) | 1.20(0.84,1.46) | 0.97(0.77,1.44) | 1.17(0.87,1.44) | NS             |
| Carnitine C10:1       | 0.99(0.86,1.29) | 1.22(0.82,1.44) | 0.97(0.78,1.28) | 1.11(0.91,1.42) | NS             |
| Carnitine C12:0       | 1.15(0.90,1.33) | 1.12(0.83,1.35) | 0.96(0.77,1.45) | 1.11(0.99,1.31) | NS             |
| Carnitine C12:1       | 1.02(0.85,1.19) | 0.95(0.87,1.19) | 1.08(0.90,1.16) | 1.05(0.91,1.24) | NS             |
| Carnitine C14:0       | 1.15(0.90,1.39) | 0.98(0.81,1.30) | 1.00(0.86,1.16) | 1.09(0.99,1.30) | NS             |
| Carnitine C14:1       | 1.10(0.86,1.24) | 1.05(0.77,1.34) | 0.90(0.60,1.34) | 1.01(0.83,1.32) | NS             |
| Carnitine C18:2       | 1.05(0.73,1.4)  | 0.88(0.77,1.53) | 0.93(0.71,1.13) | 1.01(0.94,1.18) | NS             |
| PC 1-acyl 32:0        | 1.04(0.92,1.25) | 1.03(0.90,1.10) | 1.08(0.91,1.17) | 1.17(1.03,1.26) | NS             |
| PC 1-acyl 32:1        | 0.96(0.86,1.29) | 0.89(0.80,1.06) | 1.04(0.78,1.22) | 1.07(0.87,1.27) | NS             |
| PC 1-acyl 34:0        | 1.13(0.77,1.34) | 0.94(0.80,1.20) | 1.22(0.93,1.38) | 1.09(1.02,1.25) | NS             |
| PC 1-alk 34:1         | 1.16(0.91,1.47) | 1.17(0.87,1.29) | 1.09(0.93,1.31) | 1.05(0.97,1.24) | NS             |
| PC 1-alk 34:2         | 1.09(0.87,1.31) | 1.05(0.92,1.18) | 1.15(1.04,1.28) | 1.22(1.06,1.33) | NS             |
| Indoxyl sulfate       | 1.22(1.02,1.74) | 0.83(0.59,1.38) | 1.07(0.86,1.57) | 1.29(1.05,1.77) | NS             |
| Indolepropionate      | 0.22(0.13,0.33) | 0.52(0.31,0.75) | 0.27(0.17,0.35) | 0.22(0.17,0.33) | NS             |
| p-Cresol sulfate      | 0.91(0.75,1.52) | 0.82(0.39,1.79) | 0.67(0.35,1.14) | 1.06(0.62,1.65) | NS             |
| Phenylacetylglutamine | 1.03(0.87,1.33) | 1.13(0.44,1.73) | 1.02(0.83,1.71) | 1.33(0.94,1.65) | NS             |
| Methionine            | 1.07(0.96,1.35) | 1.10(0.96,1.15) | 1.08(0.96,1.22) | 1.09(1.02,1.19) | NS             |
| 5-oxoproline          | 1.01(0.89,1.10) | 1.06(0.98,1.13) | 1.00(0.76,1.12) | 1.04(0.96,1.15) | NS             |
| Palmitic acid         | 1.09(0.72,1.55) | 1.01(0.88,1.31) | 1.27(1.00,1.55) | 0.97(0.80,1.29) | NS             |
| Phenylalanine         | 0.99(0.82,1.13) | 0.94(0.86,1.12) | 1.07(0.89,1.19) | 1.07(0.98,1.15) | NS             |

Data are presented as median (interquartile range), and the data are log transformed before analysis; Significance was determined by GEE model. *p* value was statistical significance between CS effect and RS effect.

**Table S3.** Glucose metabolism before and after 4 weeks' RS or CS supplementation in normal-weight subjects.

| Variable                                      | CS          |             | RS           |                            | p value |
|-----------------------------------------------|-------------|-------------|--------------|----------------------------|---------|
|                                               | 0 week      | 4 weeks     | 0 week       | 4 weeks                    |         |
| Blood glucose 0 min (mmol/l)                  | 4.86±0.09   | 4.84±0.10   | 4.78±0.07    | 4.85±0.10                  | NS      |
| Blood glucose 30 min (mmol/l)                 | 7.58±0.19   | 7.69±0.23   | 7.49±0.21    | 7.80±0.22                  | NS      |
| Blood glucose 60 min (mmol/l)                 | 6.88±0.33   | 6.57±0.28   | 7.04±0.34    | 6.79±0.32                  | NS      |
| Blood glucose 120 min (mmol/l)                | 5.84±0.25   | 5.54±0.16   | 5.64±0.21    | 6.03±0.28                  | NS      |
| Insulin 0min (μU/ml)                          | 8.33±0.95   | 8.13±1.03   | 8.43±1.10    | 8.31±0.76                  | NS      |
| Insulin 30 min (μU/ml)                        | 56.11±6.17  | 56.98±7.57  | 55.29±6.82   | 69.7±6.90* <sup>#</sup>    | 0.050   |
| Insulin 60 min (μU/ml)                        | 49.21±4.46  | 48.27±6.87  | 47.21±4.57   | 59.50±6.86                 | NS      |
| Insulin 120 min (μU/ml)                       | 31.70±2.49  | 28.98±2.62  | 30.16±2.57   | 38.48±4.54                 | NS      |
| C peptide 0min (ng/ml)                        | 1.67±0.11   | 1.79±0.15   | 1.69±0.12    | 1.78±0.09                  | NS      |
| C peptide 30min (ng/ml)                       | 5.56±0.44   | 5.72±0.48   | 5.50±0.47    | 6.59±0.45*** <sup>##</sup> | 0.008   |
| C peptide 60min (ng/ml)                       | 6.59±0.42   | 6.56±0.50   | 6.50±0.42    | 7.01±0.38                  | NS      |
| C peptide 120min (ng/ml)                      | 5.74±0.40   | 5.56±0.49   | 5.64±0.41    | 6.44±0.49                  | NS      |
| GIR (mg*kg <sup>-1</sup> *min <sup>-1</sup> ) | 7.97±0.58   | 8.42±0.72   | 8.27±0.51    | 8.09±0.51                  | NS      |
| HOMA-IR                                       | 1.75±0.20   | 1.69±0.20   | 1.81±0.24    | 1.81±0.18                  | NS      |
| HOMAβ (%)                                     | 119.18±8.32 | 117.69±9.34 | 132.67±17.71 | 127.00±11.40               | NS      |

Data are presented as mean ± SEM. Significance was determined by GEE model. p value was statistical significance between CS effect and RS effect;

\*  $p < 0.05$ , \*\*\*  $p < 0.001$ , RS 0 week vs. RS 4 weeks, <sup>#</sup>  $p < 0.05$ , <sup>##</sup>  $p < 0.01$ , RS 4 weeks vs. CS 4 weeks..

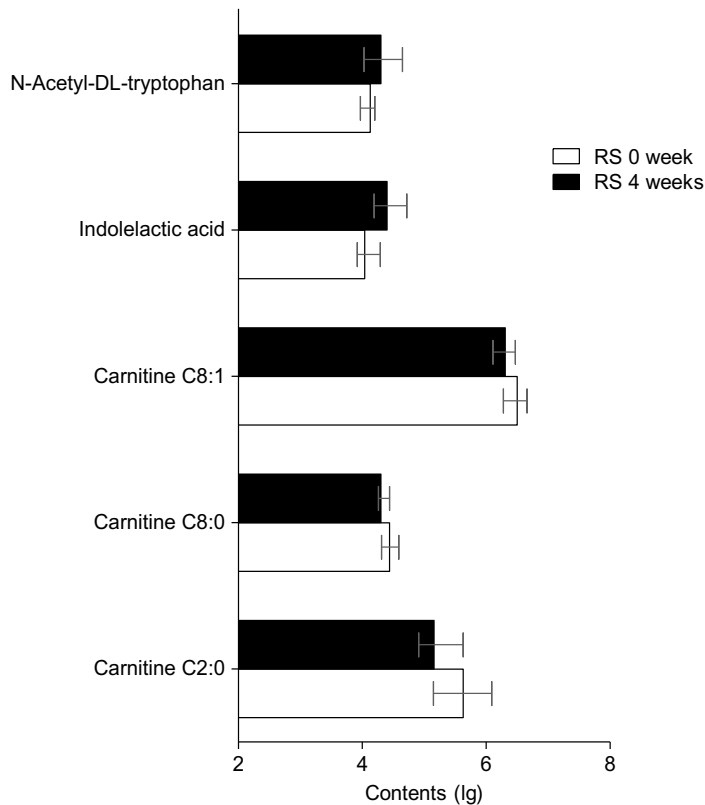

**Fig. S1.** Urine metabolomics before and after 4-week RS supplementation in normal-weight subjects. Urine metabolomics before and after 4-week RS supplementation were analyzed. Only the urine metabolomics whose content were significantly changed before and after 4-week RS supplementation in individuals with normal weight were displayed (n=19). Data represent median (interquartile range), and the data are log transformed before analysis; Significance was determined by GEE model. All were  $p < 0.05$ .

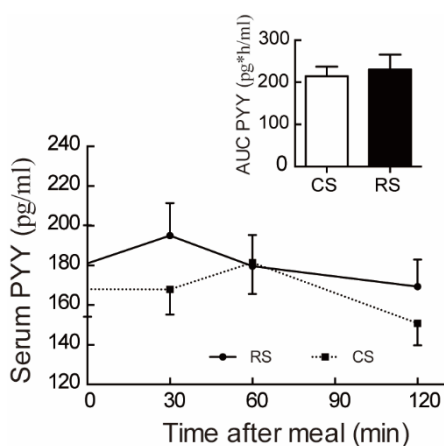

**Fig. S2.** Serum PYY levels and AUC after a standardized meal in participants after 4-week RS or CS supplementation. Data are presented as mean  $\pm$  SEM.

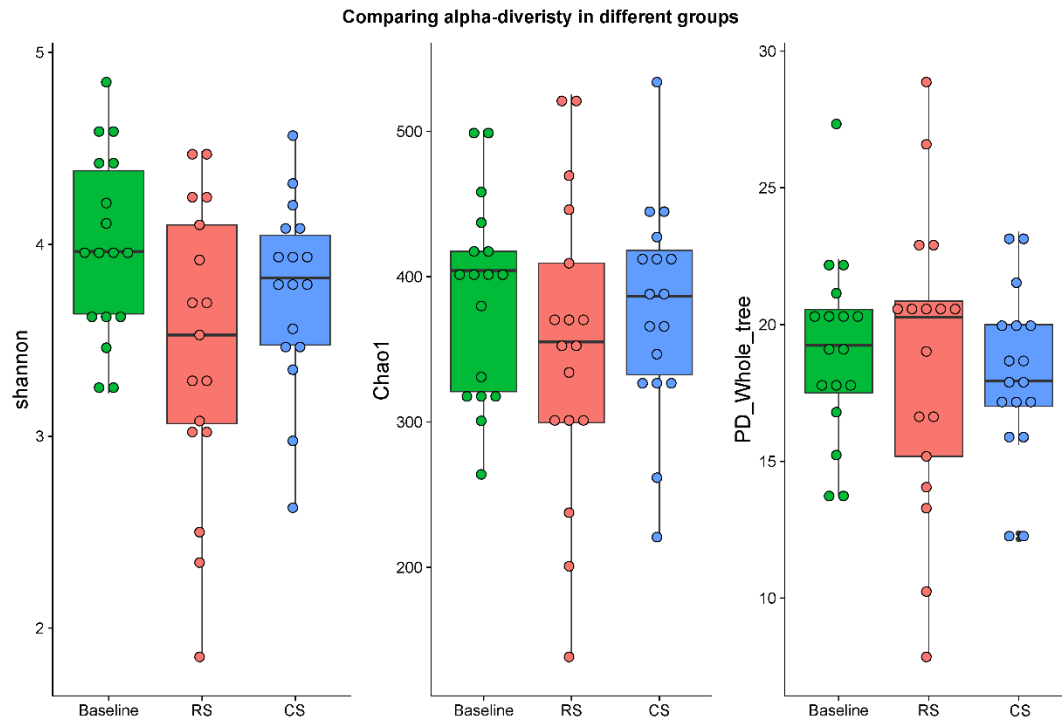

**Fig. S3.** Alpha diversity at baseline, after 4-week RS supplementation and after 4-week CS supplementation were analyzed (n=17). Data represent median (interquartile range); Significance was determined by Mann-Whitney test between groups.

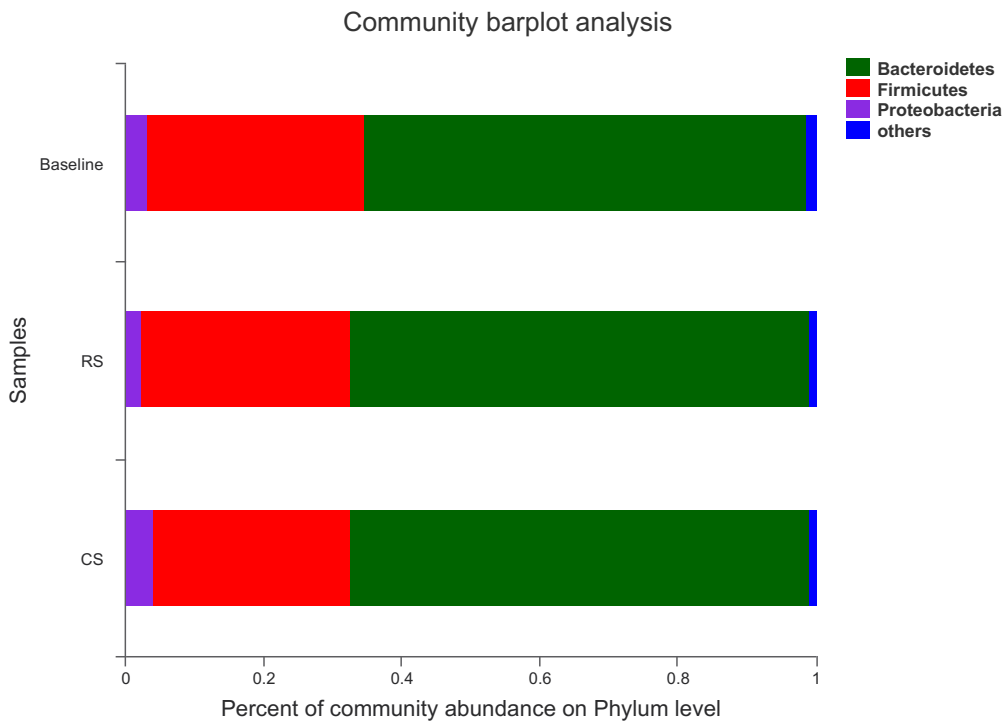

**Fig. S4.** Percent of community abundance on phylum level at baseline, after 4-week RS supplementation and after 4-week CS supplementation.

A

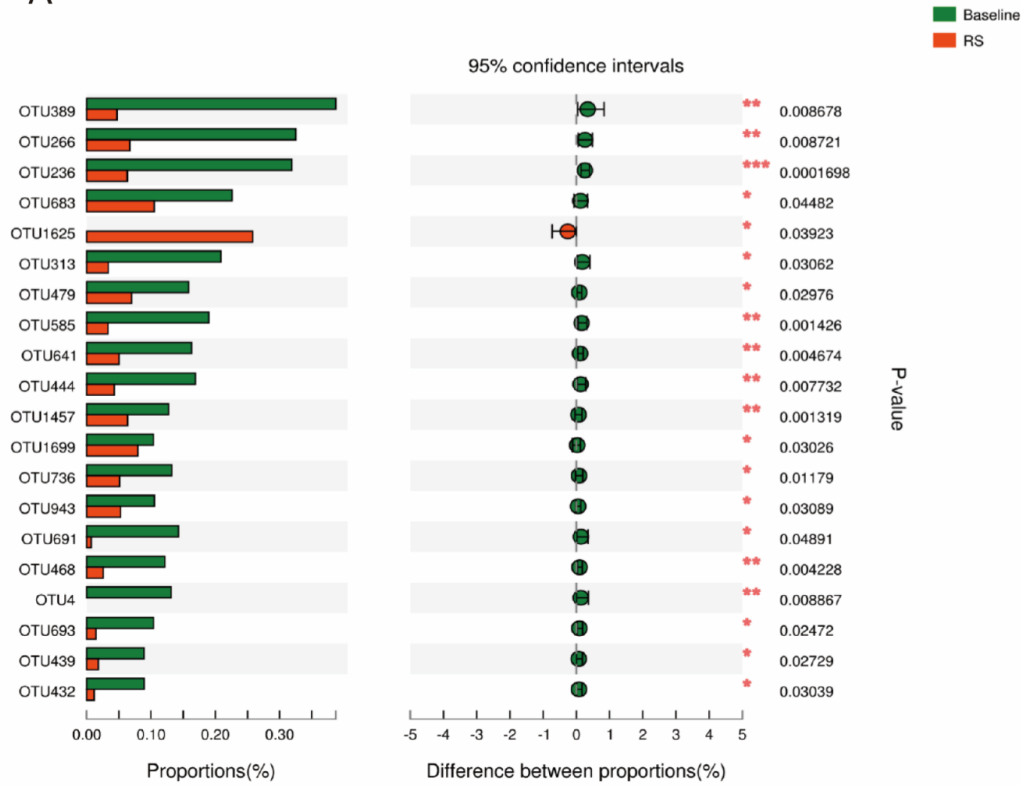

B

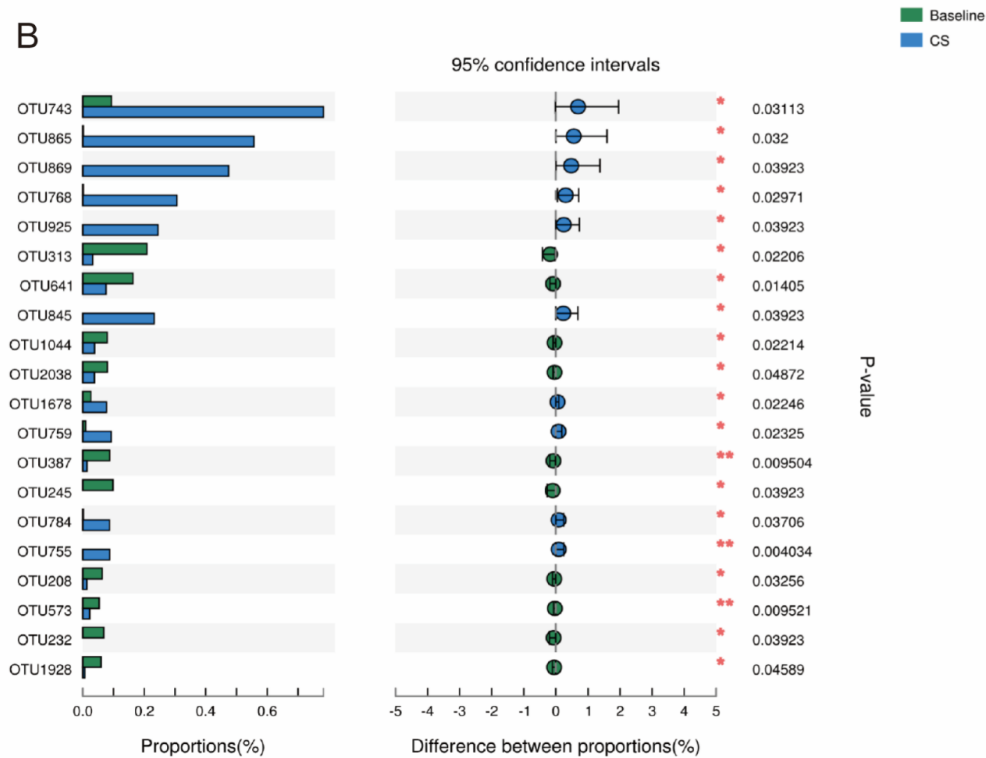

**Fig. S5.** The change of gut microbial composition after RS supplementation at the OTU level. The differences of bacterial abundances at the OTU-level before and after 4-week RS (A) or CS (B) intake in normal-weight individuals were analyzed, only the top 20 OTU whose abundances were significantly changed (\*  $p < 0.05$ , \*\*  $p < 0.01$ , \*\*\*  $p < 0.001$ , Wilcoxon signed-rank test) were displayed (n=17). Mean abundances of all samples at baseline or after supplementation were used.

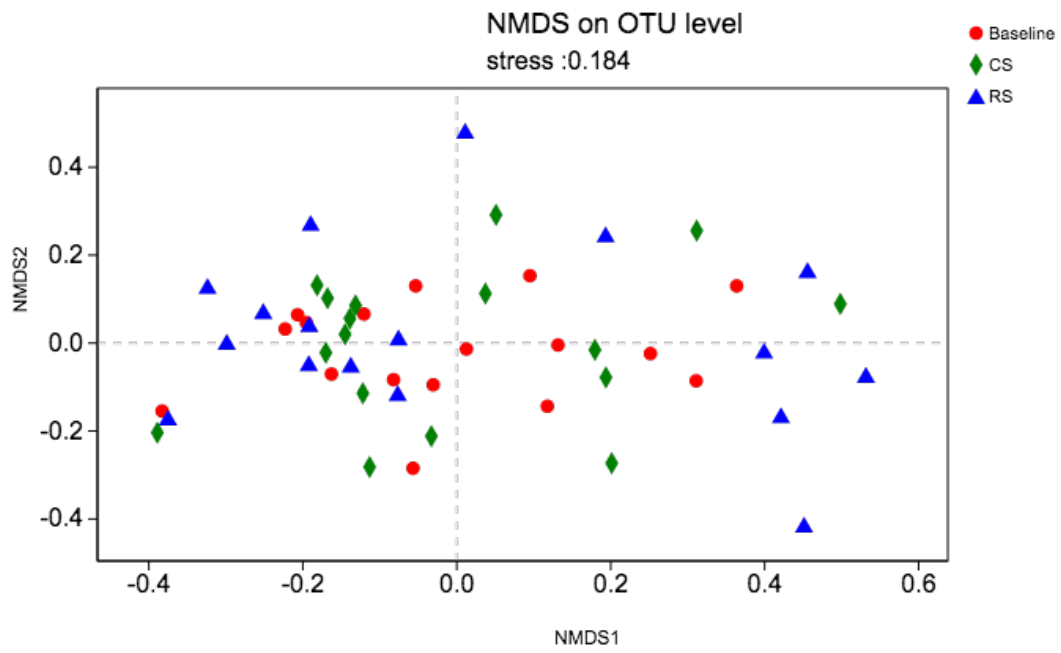

**Fig. S6.** Non-metric multidimensional scaling (NMDS) ordination plot based on OTU-level microbial beta diversity (UniFrac distances).
